# Supplementary material
Source: ML conference proceedings conference paper supplement (https://proceedings.neurips.cc/paper_files/paper/2017/hash/8a20a8621978632d76c43dfd28b67767-Abstract.html)
Supplement: Supplementary file [file 8a20a8621978632d76c43dfd28b67767-Supplemental.zip]

# Shapley Kernel Proof

November 3, 2017

The Shapley kernel is the sample weight given to each binary vector  $z' \in \{0, 1\}^M$ :

$$k(z') = k(M, s) = \frac{M - 1}{(M \text{ choose } s)s(M - s)}$$

where  $s = |z'|$ , the number of ones in  $z'$ .

Let  $X$  be the matrix of all possible binary vectors of length  $M$  with  $2^M$  rows and  $M$  columns. We use the Shapley kernel to compute the Shapley values using weighted linear regression:

$$\phi = (X^T W X)^{-1} X^T W y$$

where  $W$  is a diagonal matrix with the Shapley kernel weights for each row of  $X$ , and the  $y_i = f_x(S_i)$  values are the function outputs for each row of  $X$  (where  $S_i$  is the set of ones in  $X_{i,*}$ ). Note that  $k(M, 0) = k(M, M) = \infty$ , so  $W$  is infinity for the all zero row of  $X$  and the row of all ones. However, if we set these infinite weights to a large constant, then  $X^T W X = \frac{1}{M-1}I + cJ$  for some positive constant  $c$  (where  $I$  is the identity matrix and  $J$  is the matrix of all ones). As  $c \rightarrow \infty$  the inverted form becomes  $(X^T W X)^{-1} = I + \frac{1}{M-1}(I - J)$

The term  $X^T W$  is a matrix where all the ones in  $X^T$  have been replaced with  $k(M, s)$ , where  $s$  is the number of ones in that column of  $X^T$ . Multiplying  $X^T W$  by  $(X^T W X)^{-1}$  creates a matrix of weights to apply to the function outputs in  $y$ . If we only consider the Shapley value of a single feature  $\phi_j$ , then we only need to consider a single row of this  $2^M \times M$  matrix, which is equivalent to only using the  $j'$ th row of  $(X^T W X)^{-1}$ . When we do this we see that the value of the weight for row  $i$  is

$$k(M, s_i) \left[ \mathbf{1}_{X_{i,j}=1} - \frac{(s_i - \mathbf{1}_{X_{i,j}=1})}{M - 1} \right] = \frac{M - 1}{(M \text{ choose } s_i)s_i(M - s_i)} \mathbf{1}_{X_{i,j}=1} - \frac{(s_i - \mathbf{1}_{X_{i,j}=1})}{(M \text{ choose } s_i)s_i(M - s_i)} \quad (1)$$

$$= \frac{(M - 1)(M - s_i)!s_i!}{M!s_i(M - s_i)} \mathbf{1}_{X_{i,j}=1} - \frac{(s_i - \mathbf{1}_{X_{i,j}=1})(M - s_i)!s_i!}{M!s_i(M - s_i)} \quad (2)$$

$$= \frac{(M - 1)(M - s_i - 1)!(s_i - 1)!}{M!} \mathbf{1}_{X_{i,j}=1} - \frac{(s_i - \mathbf{1}_{X_{i,j}=1})(M - s_i - 1)!(s_i - 1)!}{M!} \quad (3)$$

$$= \frac{(M - s_i - 1)!(s_i - 1)!}{M!} [(M - 1)\mathbf{1}_{X_{i,j}=1} - (s_i - \mathbf{1}_{X_{i,j}=1})] \quad (4)$$

where  $s_i$  is the number of ones in the  $i$ 'th row of  $X$ , and  $\mathbf{1}_{X_{i,j}=1}$  is one if  $X_{i,j} = 1$  and zero otherwise. When  $\mathbf{1}_{X_{i,j}=1} = 0$  we get

$$- \frac{(M - s_i - 1)!s_i!}{M!}$$

When  $\mathbf{1}_{X_{i,j}=1} = 1$  we get

$$\frac{(M - s_i - 1)!(s_i - 1)!}{M!} [(M - 1) - (s_i - 1)] = \frac{(M - s_i - 2)!(s_i - 1)!}{M!}$$

Taking the dot product of these values with  $y$  leads to the following equation

$$\phi_j = \sum_{S \subseteq N \setminus j} \frac{(M - s_i - 1)! s_i!}{M!} [f_x(S \cup \{i\}) - f_x(S)]$$

which is a classic form of estimating the Shapley value  $\phi_j$  ( $N$  is the set of all features).
