# Supplementary material
Source: ML conference proceedings conference paper supplement (https://proceedings.neurips.cc/paper_files/paper/2017/hash/8a20a8621978632d76c43dfd28b67767-Abstract.html)
Supplement: Supplementary file [file 8a20a8621978632d76c43dfd28b67767-Supplemental.zip]

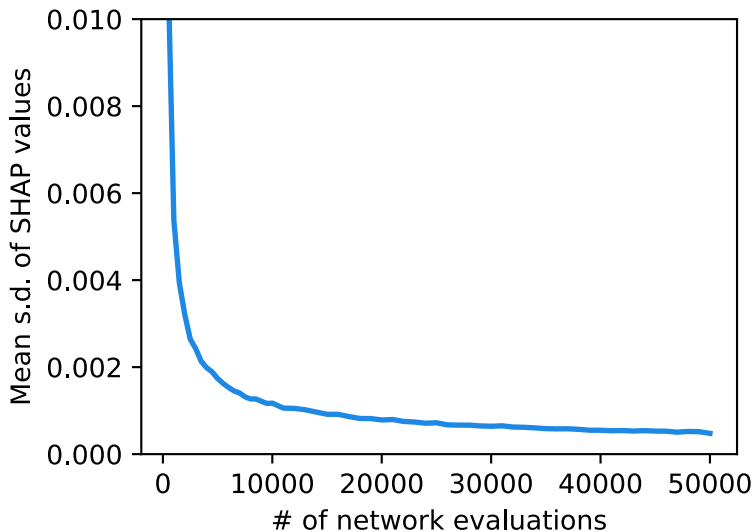

Figure S1: Convergence of Kernel SHAP estimates for the example image in Figure 5A. Standard deviation is over ten replicate runs of Kernel SHAP for each # of network evaluations considered.
